# Supplementary material for: Coordination-induced gelation of an l-glutamic acid Schiff base derivative: the anion effect and cyanide-specific selectivity
Source: Royal Society of Chemistry journal article supplement (doi:10.1039/c5cc07903a), 2015-11-06
Supplement: c5cc07903a1.pdf [file c5cc07903a1.pdf]

## Electronic Supplementary Information

# **Coordination-induced gelation of an L-glutamic acid Schiff base derivative: the anion Hofmeister effect and cyanide-specific selectivity**

Jinguo Sun<sup>‡</sup>, Yucun Liu<sup>‡</sup>, Longyi Jin, Tie Chen\* and Bingzhu Yin\*

Key Laboratory of Natural Resources of Changbai Mountain & Functional Molecules of Ministry of Education, Department of Chemistry, Yanbian University, Yanji, Jilin 133002, PR China.

E-mail: [zqcong@ybu.edu.cn](mailto:zqcong@ybu.edu.cn);

Fax: +86 433 2732456;

Tel: +86 433 2732298.

## **1. Instrumentation**

### **Gelation study**

A weight amount of molecule **G** with metals adding a measured volume of the solvent were placed in a sealed test tube and made a clear solution by heating. And then, the system left at room temperature. The transition temperatures ( $T_{gel}$ ) were determined by ball-drop method.

### **NMR experiments**

All solution state NMR studies were carried out on Bruker AV-300 Spectrometer (300 MHz for  $^1\text{H}$  and 75 MHz for  $^{13}\text{C}$ ) and chemical shifts were referenced relative to tetramethylsilane ( $\delta_{\text{H}}/\delta_{\text{C}}=0$ ).

### **FT-IR spectroscopy**

IR spectra were recorded on a Shimadzu FT-IR Prestige-21 instrument with the KBr disk technique.

### **MALDI-TOF-MS spectrometry and High-resolution mass spectra (HRMS)**

Mass spectra were performed on a Shimadzu Axima CFR<sup>TM</sup> Plus using a 1,8,9-anthracenetriol (DITH) and  $\beta$ -phenylacrylic acid (CHCA) matrix.

High-resolution mass spectra (HRMS) were obtained using a Bruker microTOF II focus spectrometer (ESI).

### **Circular dichroism (CD) spectroscopy**

CD spectra were obtained on Chirascan spectrometer using a 1 mm path-length cell.

### **Atomic force microscopy (AFM)**

For AFM experiments, 10  $\mu\text{L}$  of sample solution (diluted gels) was drop-casted onto a freshly cleaved mica surface. Each sample was air-dried 48 h in a dust-free environment prior to AFM imaging. The images were obtained by scanning the mica surfaces in air under ambient conditions using Agilent-5500 in tapping mode.

### **UV-vis spectroscopy**

UV-vis spectra were recorded on a Hitachi U-3010 spectrophotometer.

### **Fluorescence spectroscopy**

Fluorescence spectra were recorded on a Shimadzu RF-5301PC fluorescence spectrophotometer.

### **Field emission scanning electron microscopy**

The gel samples were placed on silicon wafer, and dried for 24h under room temperature before imaging. A layer of gold was sputtered on top to form a conducting surface and finally the specimen was transferred into the Field Emission Scanning Electron Microscope (FE-SEM, Joel Scanning Microscope-JSM-6700F).

### **X-ray scattering**

Small-angle X-ray scattering (SAXS) measurements were carried out at 298 K on a beamline 1W2A synchrotron radiation X-ray small angle system at Beijing Synchrotron Radiation Facility( $\lambda = 1.54\text{\AA}$ ) and wide -angle X-ray diffracting (WAXRD) measurements were carried out at 298 K on the glass-sustained xerogel films and recorded on a Bruker D8/ADVANCE X-ray diffractometer (Germany) with radiation ( $\lambda = 1.54\text{\AA}$ ).

## 2. Synthesis and characterization of organic compounds

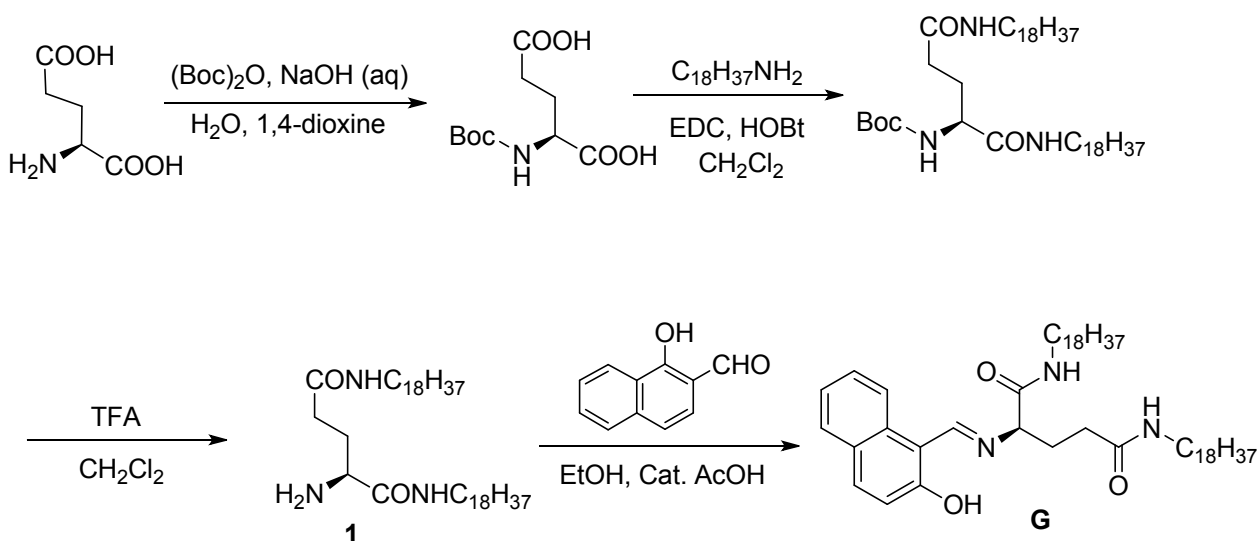

**Scheme S1. The synthetic route of compound G.**

Compounds **1** were synthesized according to literatures methods.<sup>1</sup>

Compound **G** was synthesized as follow: 2-hydroxy-1-naphthaldehyde (1 mmol), compound **1** (1 mmol) and acetic acid (40  $\mu\text{L}$ , as a catalyst) were added to ethanol (10 mL). Then the reaction mixture was stirred under refluxed conditions for 6 hours, the crude solutions were cooled and filtered. The filtered powder was recrystallized with  $\text{C}_2\text{H}_5\text{OH}$  to get solid of compound **G**. yellow powder, Yield: 80%. Characterization of **G**: m.p. 130-131  $^\circ\text{C}$ .  $^1\text{H}$  NMR ( $\text{CDCl}_3$ , 300 MHz):  $\delta$ , 14.2 (br, 1H, OH), 9.31 (s, 1H, -N=CH-), 8.04 (d,  $J = 7.8$  Hz, 1H, ArH), 7.82(d,  $J = 9.0$  Hz, 1H, ArH), 7.74 (d,  $J = 7.8$  Hz, 1H, ArH), 7.54 (t,  $J = 7.2$  Hz, 1H, ArH), 7.35 (t,  $J = 7.2$  Hz, 1H, ArH), 7.10 (d,  $J = 9.0$  Hz, 1H, -ArH), 6.28 (s, 1H, -NH), 5.83 (s, -NH), 4.18 (s, 1H, CH), 3.18-3.34 (m, 4H), 2.20-2.41 (m, 4H), 1.42-1.53 (m, 4H), 1.20-1.29 (m, 60H), 0.88 (t,  $J = 6.6$  Hz, 6H) ppm.  $^{13}\text{C}$  NMR ( $\text{CDCl}_3$ , 300 MHz): 171.71, 170.20, 162.16, 136.16, 132.94, 127.32, 123.60, 121.13, 119.05, 108.19, 69.79, 39.69, 31.94, 30.85, 29.90, 26.90, 22.71, 14.15 ppm. IR (KBr,  $\text{cm}^{-1}$ )  $\nu$ : 3315 (OH), 3093 (NH), 3049 (NH), 1619(C=O). MALDI-TOF-MS calcd for  $\text{C}_{52}\text{H}_{89}\text{N}_3\text{O}_3$ : 804.28; found: 805.7  $[\text{M}+\text{H}]^+$ .

## Reference

[1] Y. G. Li, T. Y. Wang and M. H. Liu, *Soft Matter*, 2007, 3, 1312.

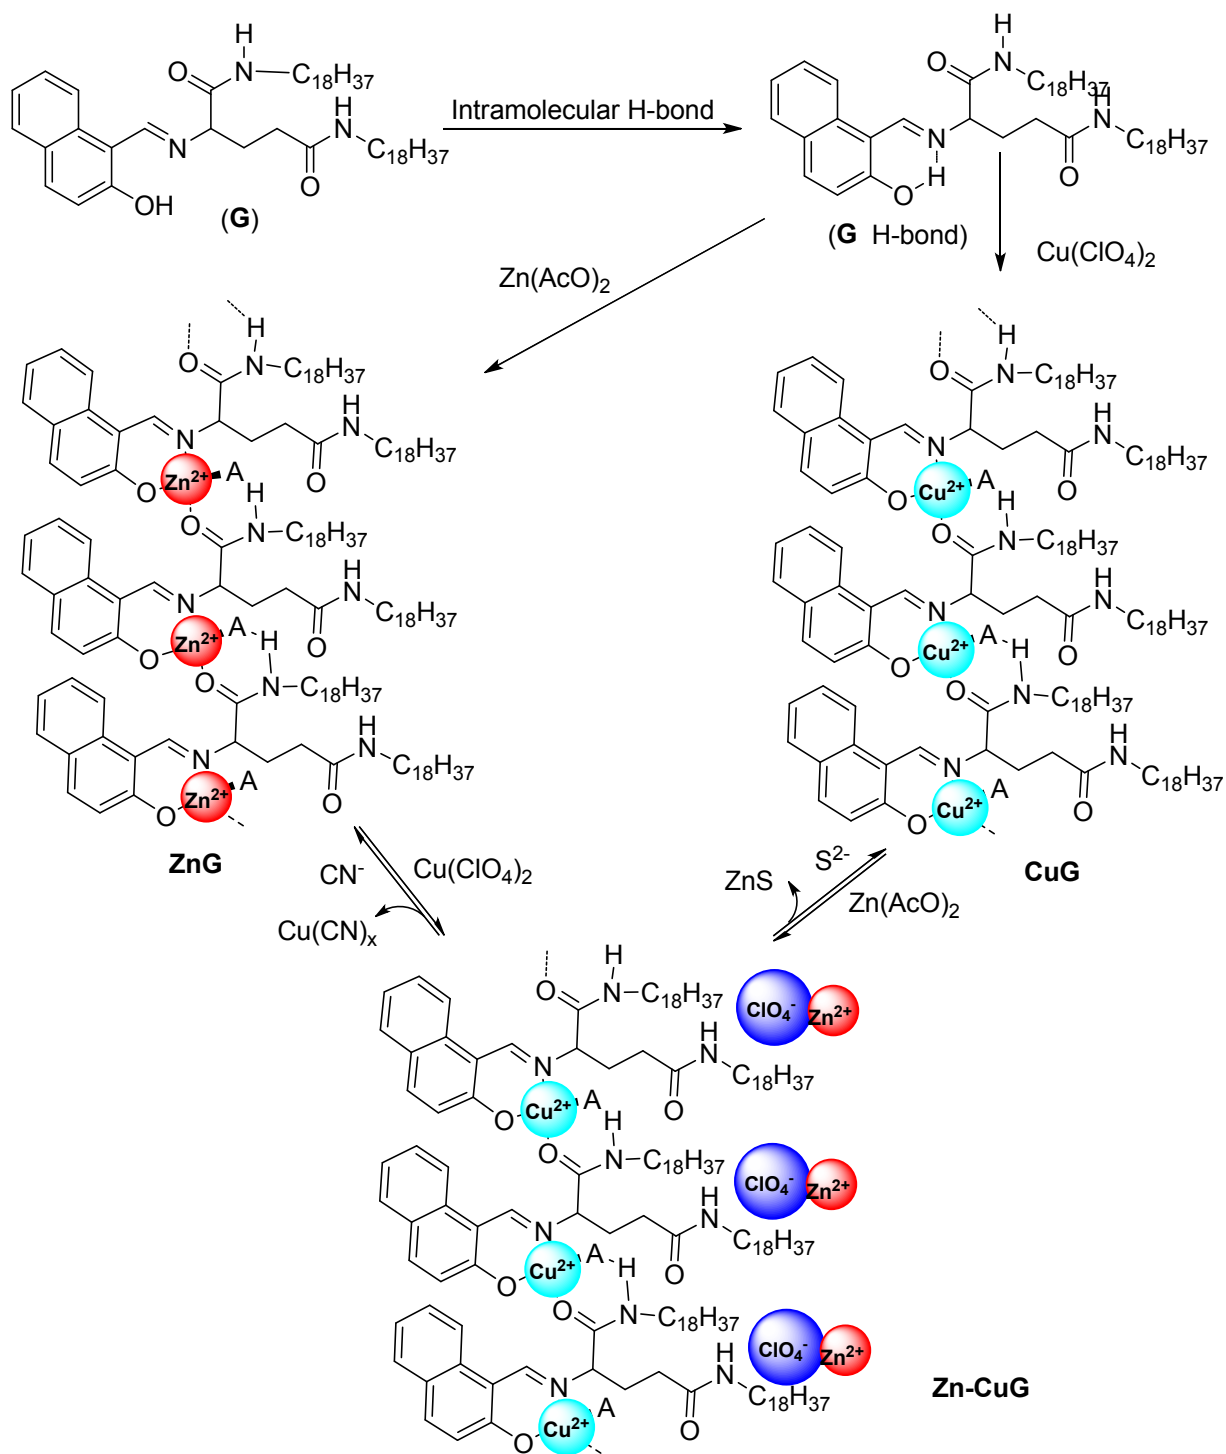

**Scheme S2** Chemical structure of the **G** and the assumed self-assembly and stimuli-responsive mechanism.

**Table S1** Gelation Properties of **G**, **ZnG**, **CuG** and **Zn-CuG**.

| Solvents         | <b>G</b>       | <b>ZnG</b>              | <b>CuG</b>  | <b>Zn-CuG</b> |
|------------------|----------------|-------------------------|-------------|---------------|
|                  | Phases         |                         |             |               |
| Cyclohexane      | P <sup>a</sup> | P                       | P           | P             |
| Toluene          | P              | P                       | P           | P             |
| Petroleum ether  | P              | P                       | P           | P             |
| THF              | S              | S                       | S           | S             |
| Chloroform       | S              | S                       | S           | S             |
| Dichloromethane  | S              | S                       | S           | S             |
| Acetone          | P              | P                       | P           | P             |
| Acetonitrile     | P              | P                       | P           | P             |
| DMF              | P              | S                       | 1.0 % (TG)  | S             |
| DMSO             | P              | 0.93% <sup>b</sup> (TG) | 0.88 % (TG) | 1.0 % (TG)    |
| Methanol         | P              | P                       | P           | P             |
| Ethanol          | P              | P                       | P           | P             |
| Glycol           | P              | S                       | S           | S             |
| Propyl alcohol   | P              | S                       | P           | P             |
| Isopropanol      | P              | P                       | P           | P             |
| Benzene          | P              | P                       | P           | P             |
| Benzyl alcohol   | S              | S                       | S           | S             |
| Chlorobenzene    | S              | P                       | P           | P             |
| Ethyl acetate    | P              | P                       | P           | P             |
| <i>n</i> -hexane | P              | P                       | P           | P             |

<sup>a</sup>TG: transparent gel; S: solution; P: precipitation

<sup>b</sup>The critical gelation concentration (wt %, 10 mg/mL = 1%).

## 2. Figures

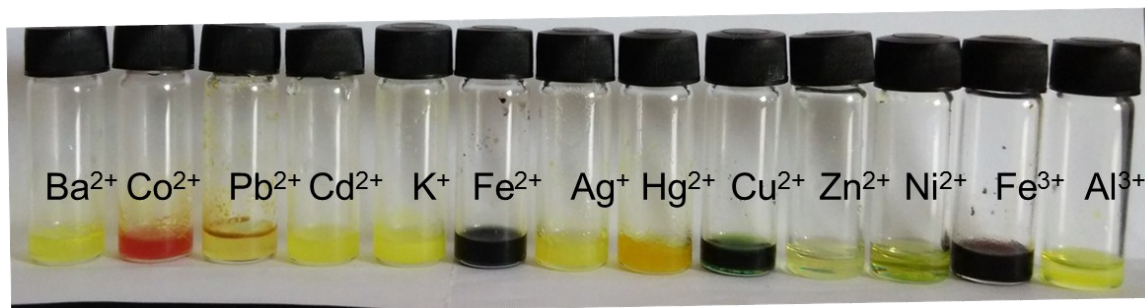

**Fig. S1** Photographs of the solutions of **G** in DMSO (10 mg/mL) in the presence of one equiv. of various metal ions as their perchlorate salts.

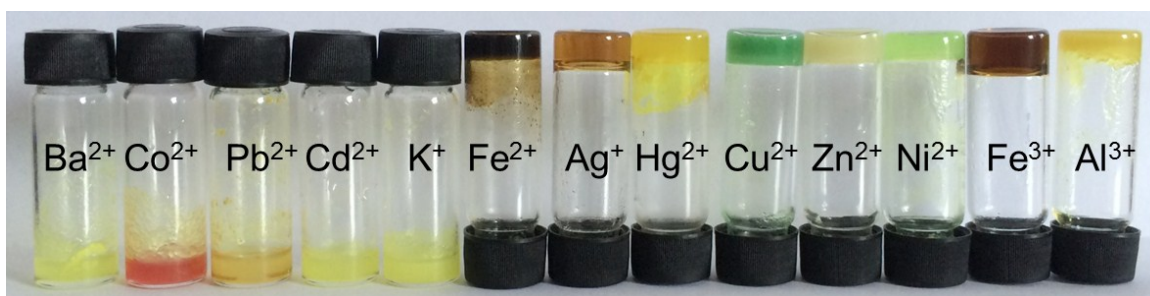

**Fig. S2** Photographs of the solutions or gels of **G** and cation in DMSO (**G**: 10 mg/mL) in the presence of sodium acetate (**G**: cation: sodium acetate =1: 1: 1).

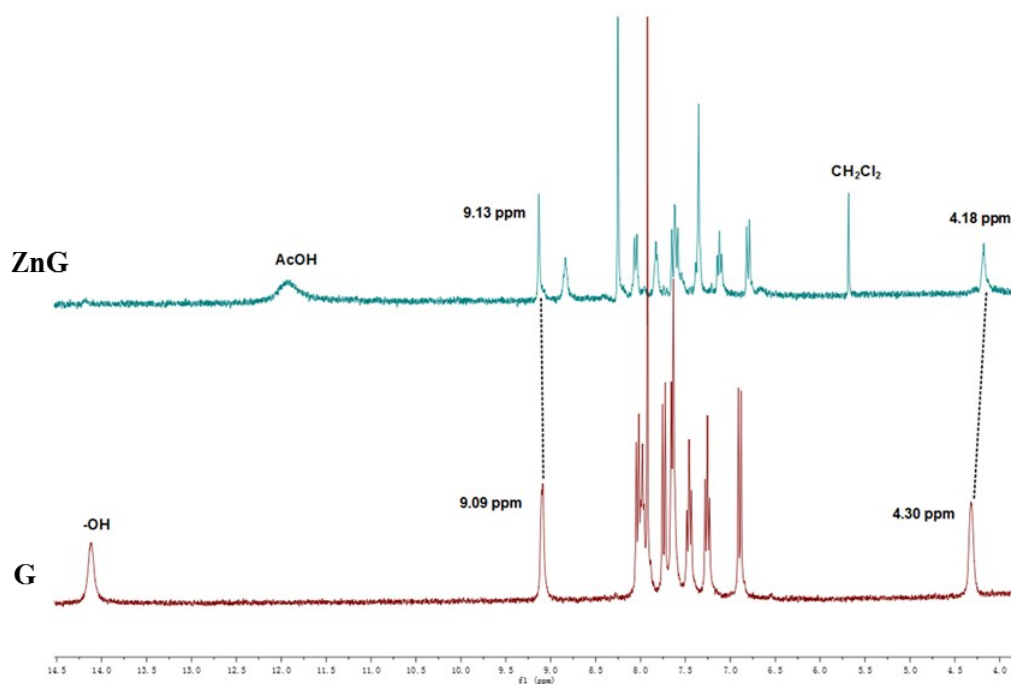

Fig. S3 Partial <sup>1</sup>H NMR spectra of **G** and **ZnG** in *d*<sub>6</sub>-DMSO-CDCl<sub>3</sub> (v/v, 5:2)

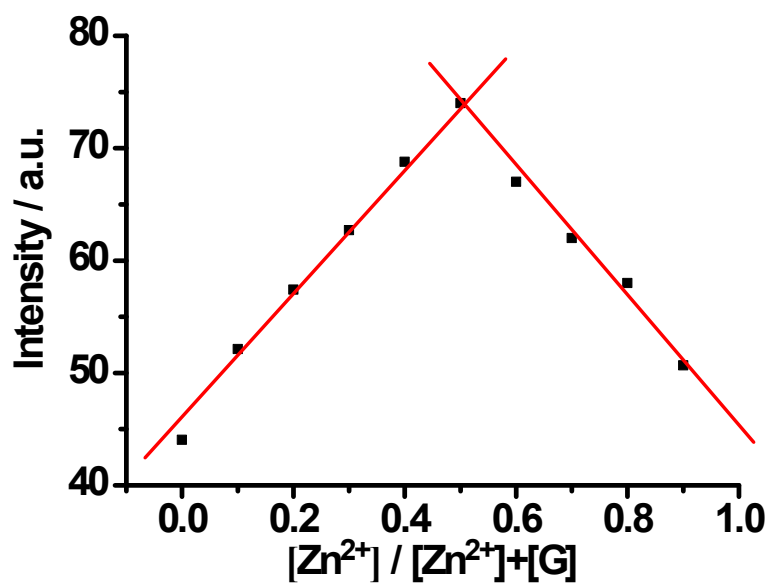

Fig. S4 Job's plot between **G** and Zn<sup>2+</sup> based on the data of fluorescence spectra. [**G**] + [Zn<sup>2+</sup>] = 1 μM.



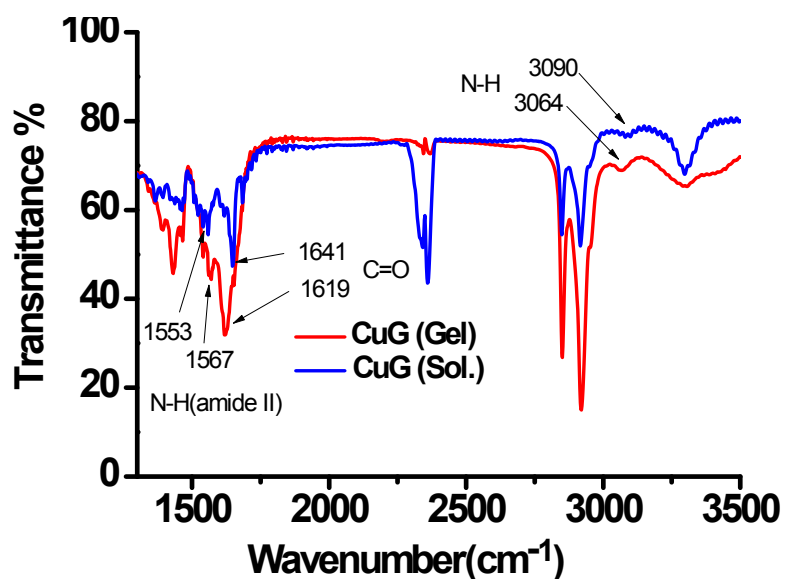

**Fig. S5** FT-IR spectra of solution and xerogel of metallogel ZnG (obtained from 1 % DMSO metallogel, ZnG, G : Zn<sup>2+</sup> = 1 : 1).

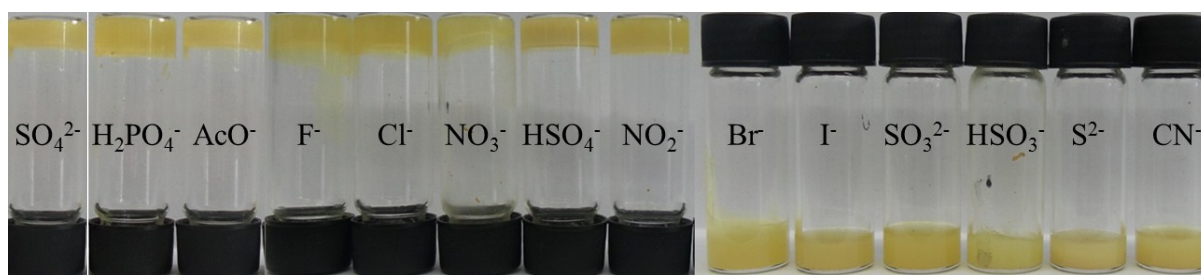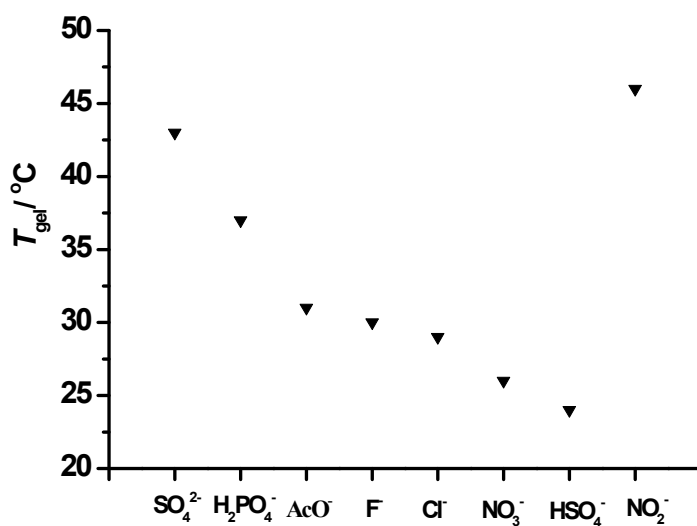

**Fig. S6** Photograph of solutions and gels of G and Zn(ClO<sub>4</sub>)<sub>2</sub> in DMSO (G: 10mg/mL) in the presence of various anions (G : anion: Zinc perchlorate = 1 : 1 : 1, up) and melting temperature ( $T_{gel}$ ) of the gels of G and Zn<sup>2+</sup> in presence of various anions in DMSO (down).

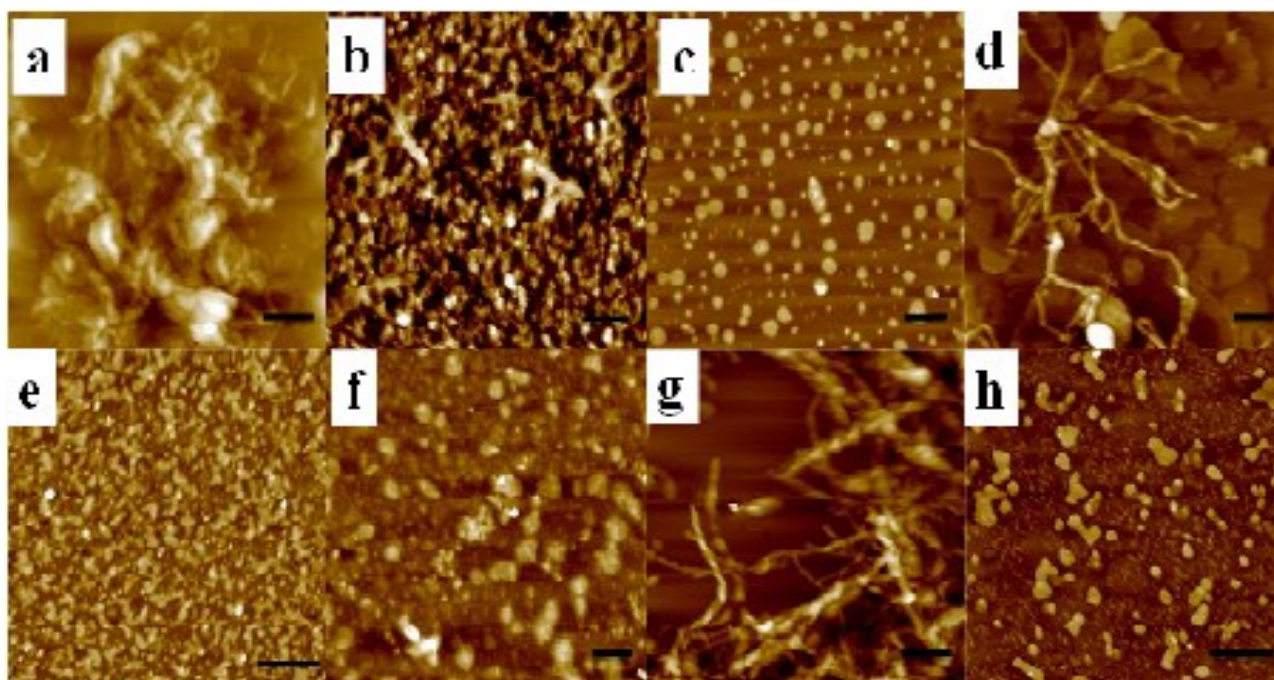

**Fig. S7** AFM images of metallogels **CuG**. Counterions: a) sulfate, b) phosphate, c) acetate, d) fluoride, e) chloride, f) nitrate, g) bisulfate and h) nitrite salts of sodium. Scale bar represents 500 nm.

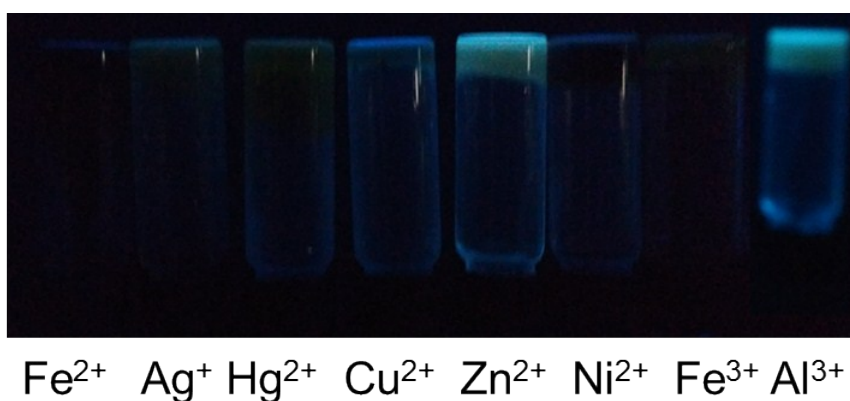

**Fig. S8** Photographs of gels of compound **G** and  $\text{Cu}(\text{ClO}_4)_2$  in DMSO (**G**: 10 mg/mL) in the presence of various metal ions as their acetates (**G**: cation: sodium acetate =1: 1: 1) under UV light.

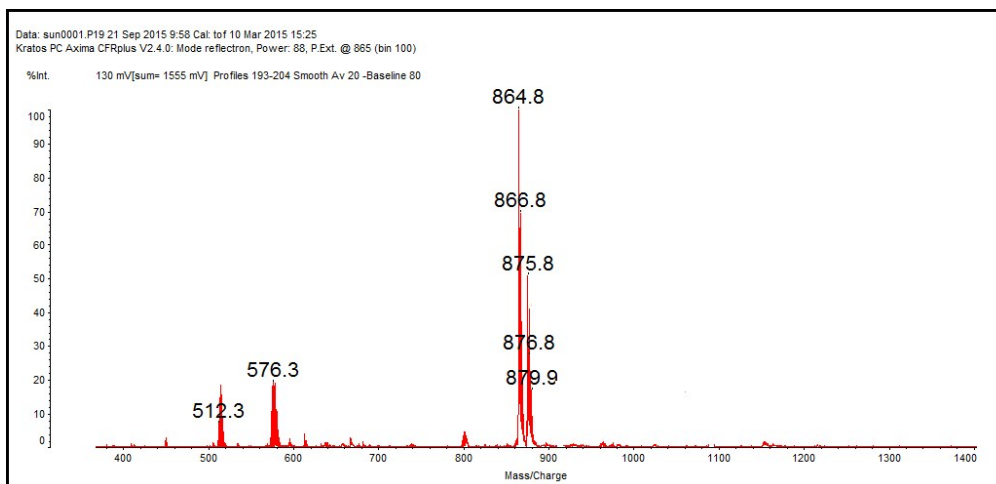

**Fig. S9** MAFDI-TOF-MS of Zn-CuG.

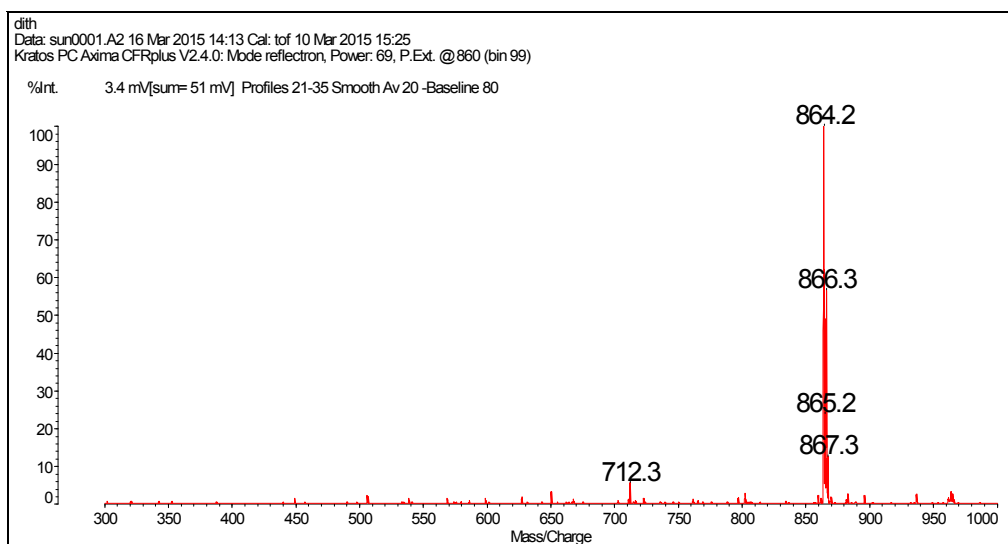

**Fig. S10** MAFDI-TOF-MS of CuG.

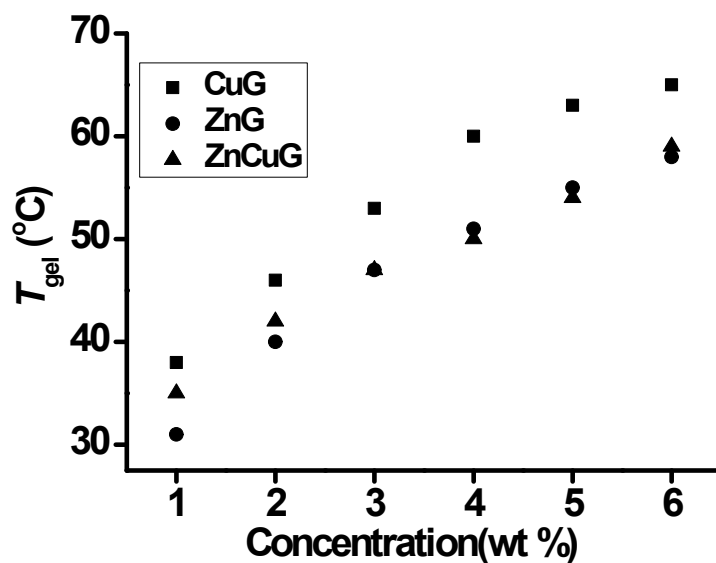

**Fig. S11** Plots of  $T_{gel}$  against the concentrations of metalogels ZnG, CuG and Zn-CuG from DMSO (for ZnG, G : Zn<sup>2+</sup> = 1 : 1; for CuG, Cu<sup>2+</sup> : G=1:1; for Zn-CuG, G :Cu<sup>2+</sup> : Zn<sup>2+</sup> =1:1:1).

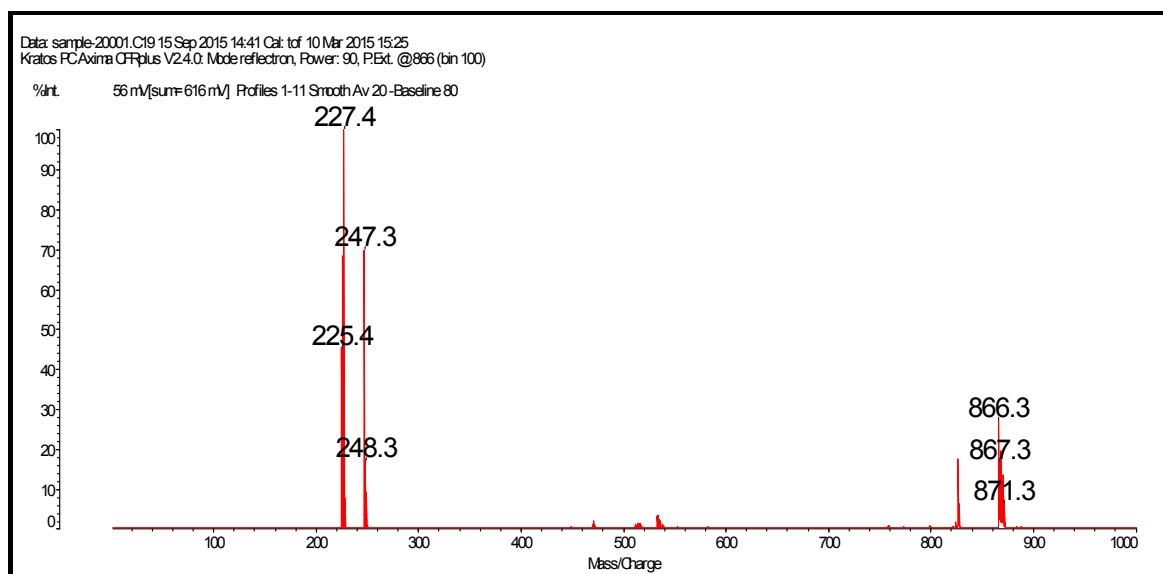

**Fig. S12** MAFDI-TOF-MS of Zn-CuG treated with CN<sup>-</sup> (2 equiv.). [G + Zn<sup>2+</sup> - H] = 866.61, found 866.3.

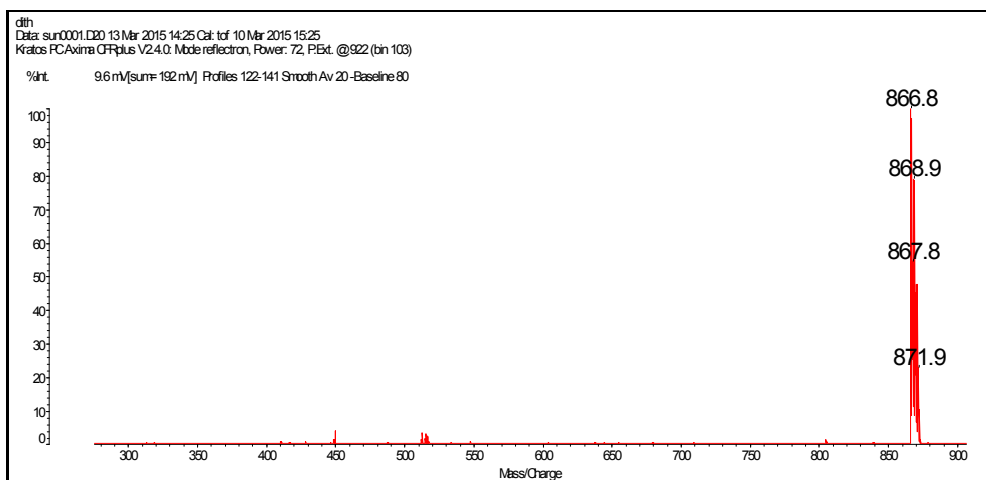

**Fig. S13** MAFDI-TOF-MS of ZnG.  $[G + Zn^{2+} - H] = 866.61$ , found 866.8.

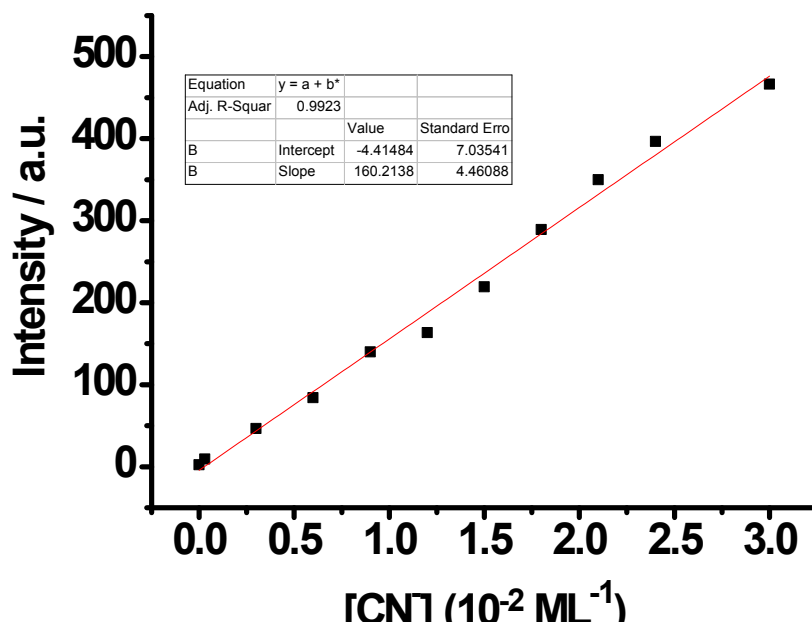

**Fig. S14** Plot of the emission intensities of Zn-CuG at 457 nm as a function for concentrations of CN<sup>-</sup>.

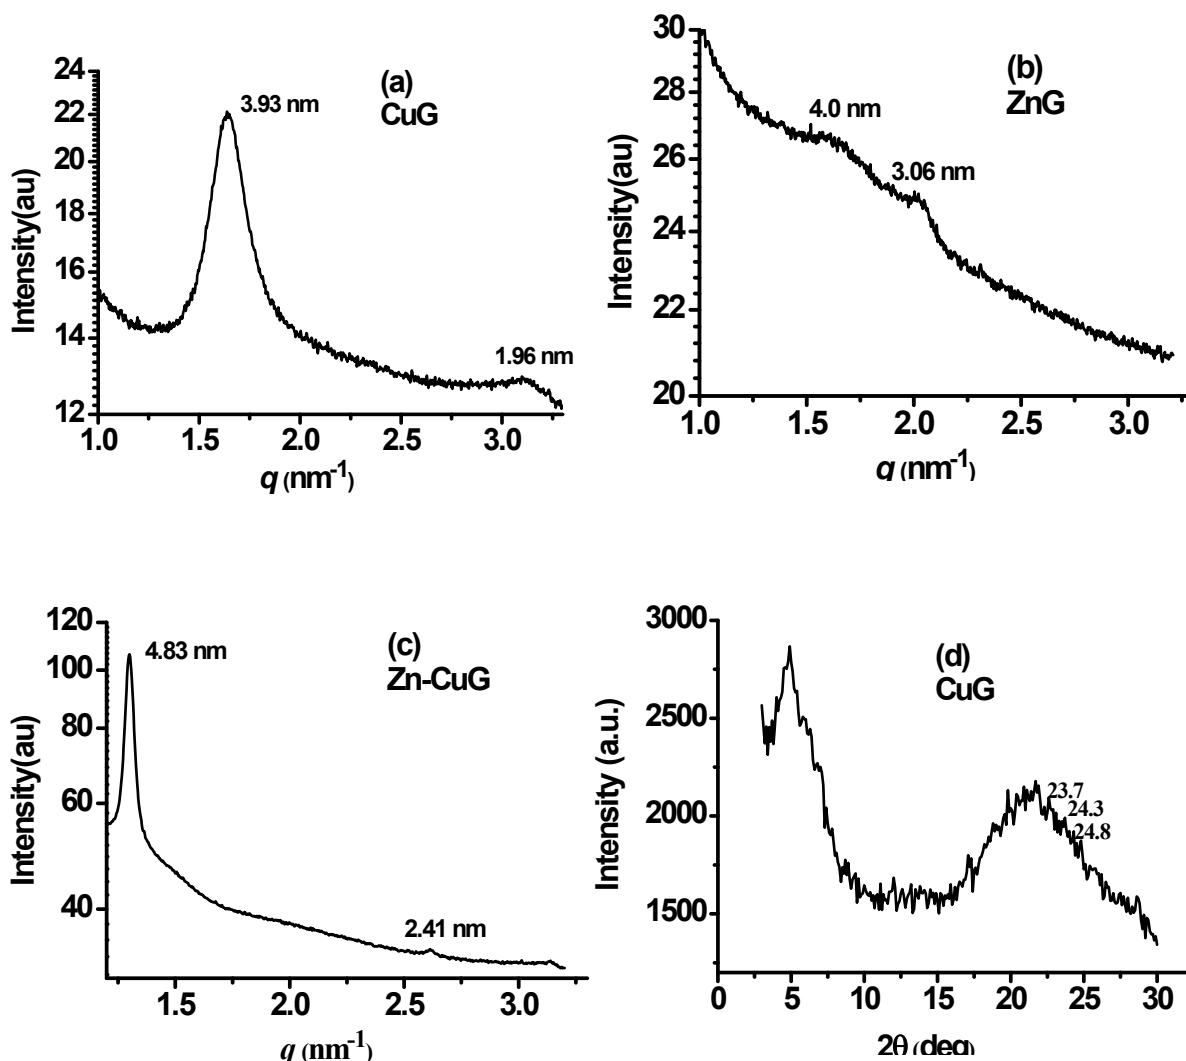

**Fig. S15** Powder SAXRD and WAXRD patterns of xerogels of **CuG** (a), **ZnG** (b), (c) **Zn-CuG** and (d) **CuG**, respectively (obtained from 1% DMSO solutions of metalloids; for **CuG**, G : Cu<sup>2+</sup> = 1 : 1; for **ZnG**, G : Zn<sup>2+</sup> = 1 : 1); for **ZnCuG**, G : Cu<sup>2+</sup> : Zn<sup>2+</sup> = 1 : 1 : 1).

To gain further insight into the structures of the metalloids, small angle X-ray diffraction (SAXRD) measurements were performed. As shown in Figure S12a, the reflection peaks of **CuG** corresponding to *d*-spacing of 3.93 and 1.96 nm were detected following the ratio of 1 : ½, which revealing the lamellar structure of the supramolecular gel. The calculated length of compound **1** molecule was 3.21 nm (CPK space-filling model), indicating that the space lattice was composed of two molecules with the flexible chains interdigitated or Inclined. As for the xerogel of **ZnG**, the diffraction peaks appeared at *q* values of 1.57 and 2.05 nm<sup>-1</sup>, respectively, following the ratio of 1 : √2. It strongly reveals the rectangular columnar structure of the **ZnG** with *a* = 4 nm and *b* = 4.05 nm (Figure S12b). The number of molecules within the cell unit was approximately 12 with two molecules cross together based on calculations using the equation. When doped Cu<sup>2+</sup> into the **ZnG**, the bilayer lamellar structure was formed in the **Zn-CuG** system, with a scattering vector ratio of 1:2 (*q* values were 1.3 and 2.6 nm<sup>-1</sup>). However, the layer distance of the **Zn-CuG** was estimated to be 4.83 nm which was larger than interlayer spacing of the **CuG** (Figure S12c). Moreover, the peaks at

$2\theta = 21.9\text{--}24.8^\circ$  corresponded to  $d$ -spacing  $3.58\text{--}4.05 \text{ \AA}$ , which suggested that  $\pi\text{--}\pi$  stacking existed in the naphthyl and alkyl groups of these gels (Figure S12d). The reasonable packing of the metallogels in the aggregates in DMSO is schematically represented in Figure S13.

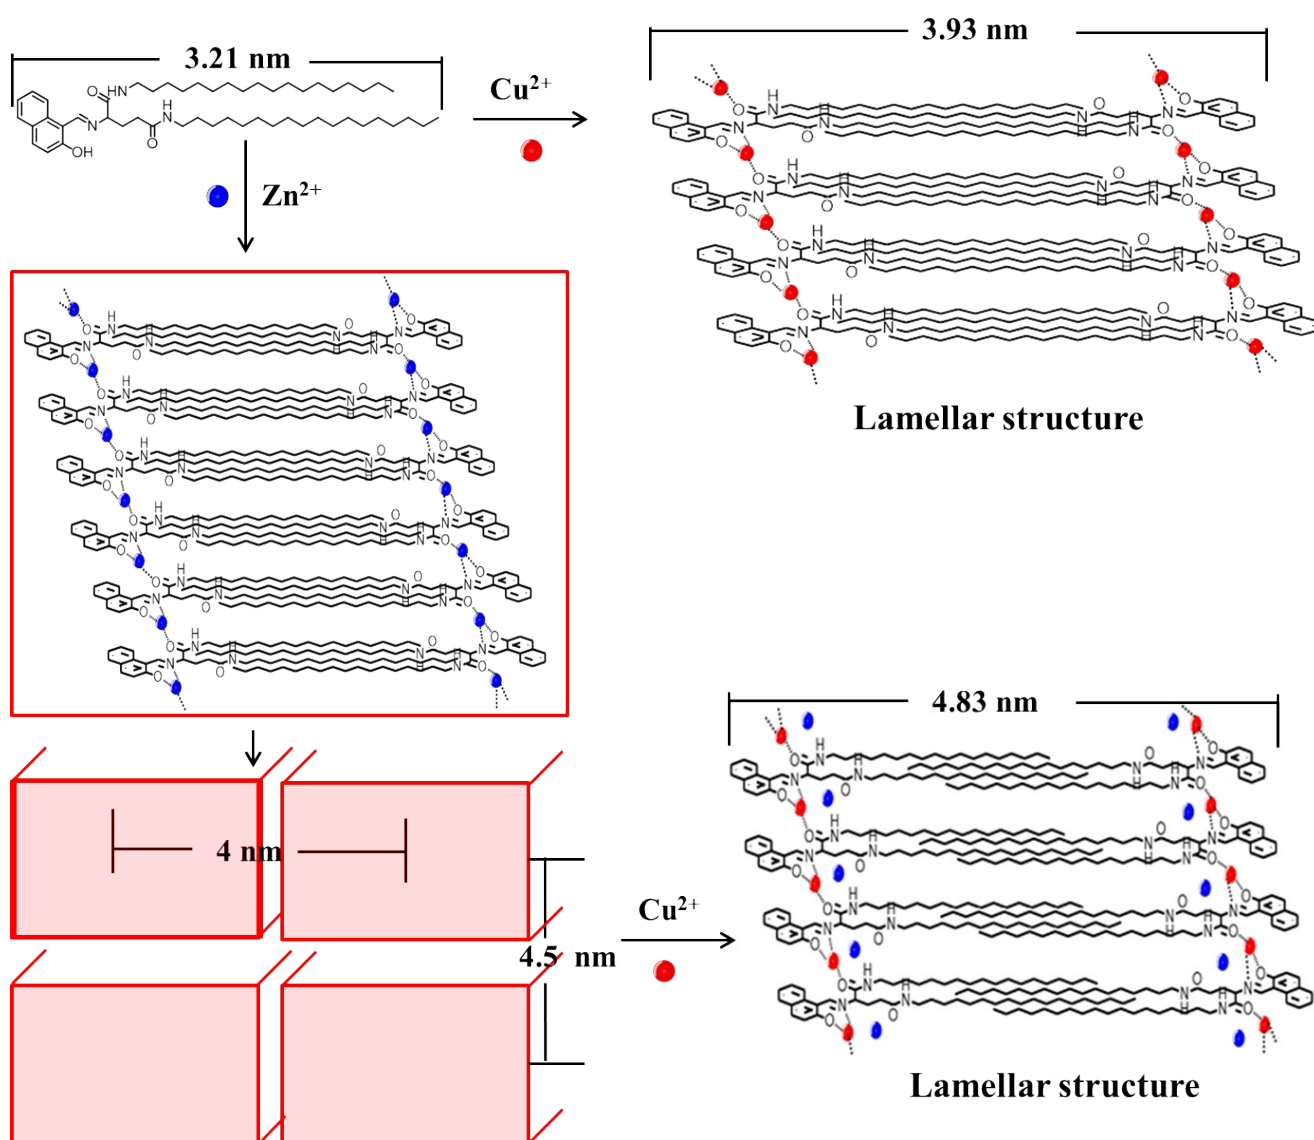

**Fig. S16** Cartoon representation of the self-assembly of **CuG**, **ZnG** and **Zn-CuG**.

### 3. Characterization of G

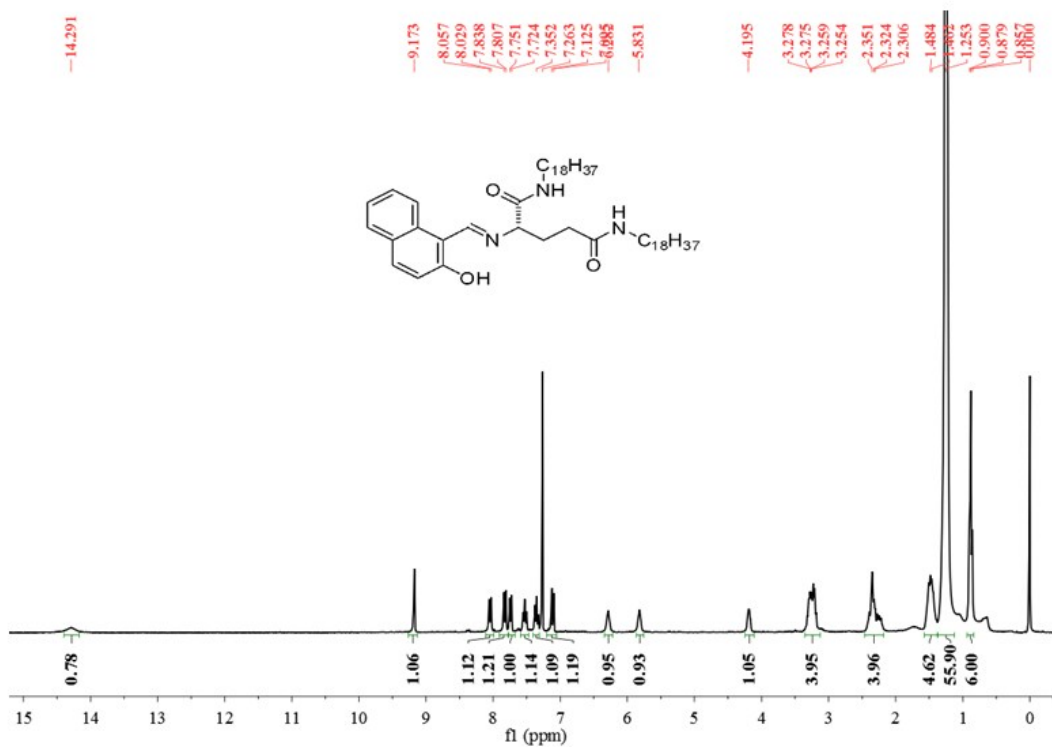

Fig. S17  $^1\text{H}$  NMR of G

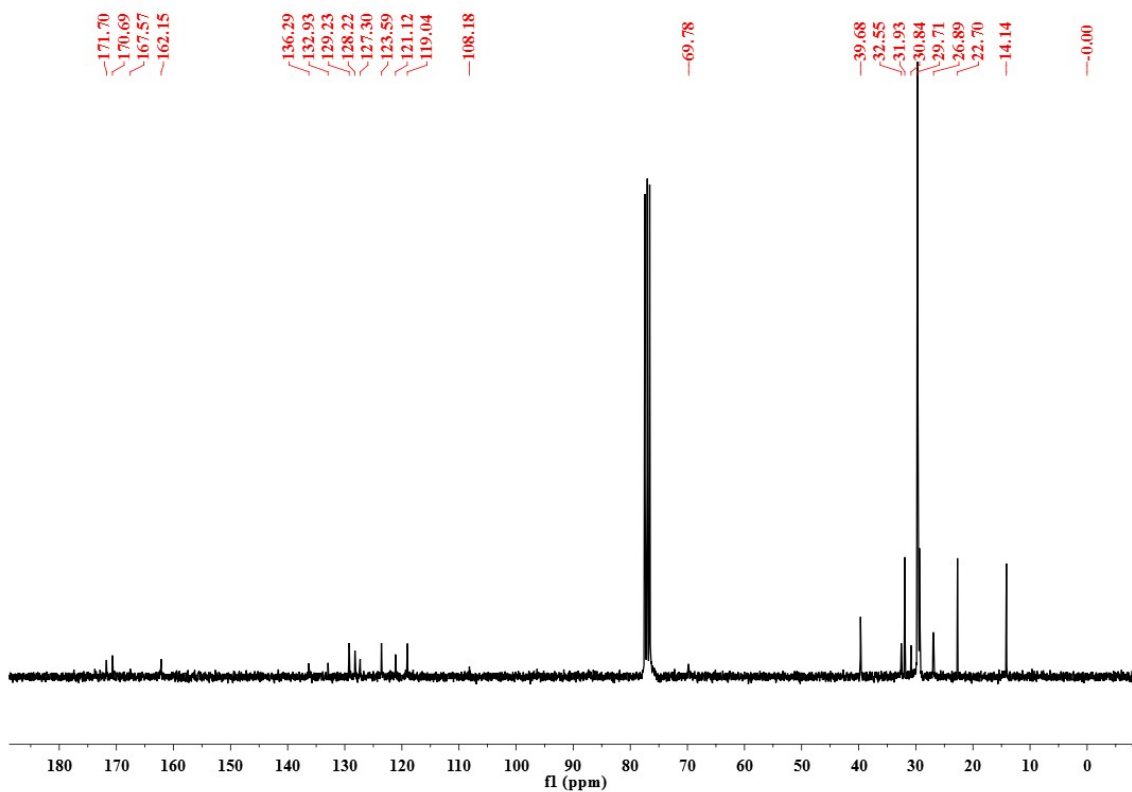

Fig. S18  $^{13}\text{C}$  NMR of G



DITH  
Data: SUN0001.K16 30 Apr 2014 11:53 Cal: tof 10 Mar 2014 16:55  
Kratos PC Axima CFRplus V2.4.0: Mode reflectron, Power: 138, P.Ext. @ 1233 (bin 110)

%Int. 2.2 mV[sum= 63 mV] Profiles 42-70 Smooth Av 20 -Baseline 80

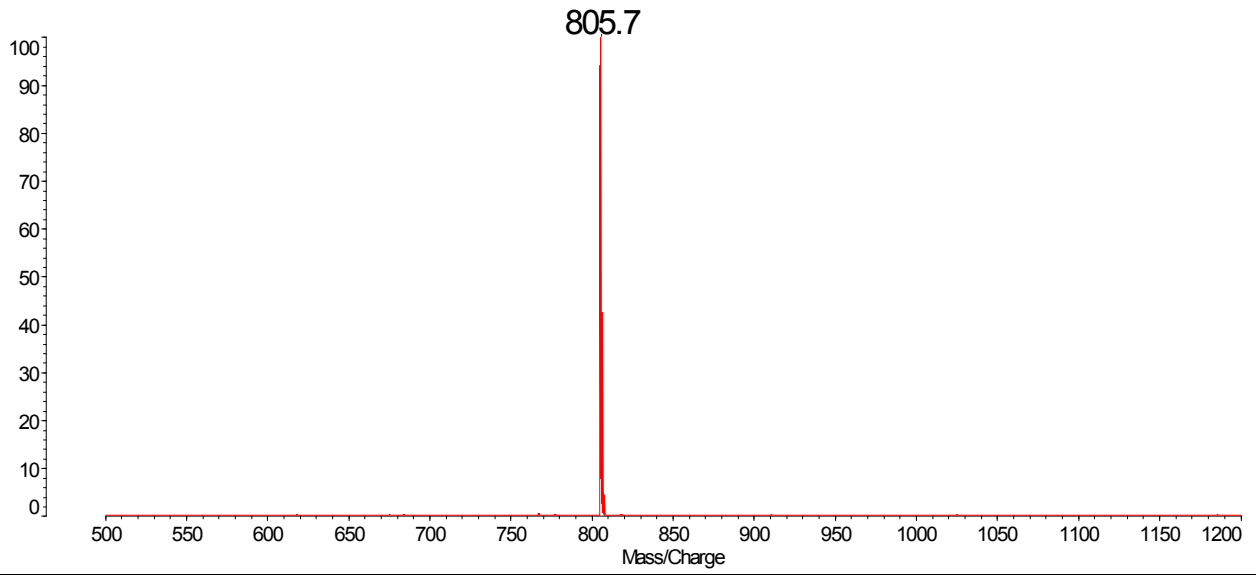

**Fig. S19** MALDI-TOF-MS of **G**
